1 GluN2B-containing NMDA receptors are required for potentiation and depression of responses in  
2 ocular dominance plasticity

3 Michelle Bridi<sup>1,2</sup>, Su Hong<sup>1</sup>, Daniel Severin<sup>1</sup>, and Alfredo Kirkwood<sup>1</sup>

4 <sup>1</sup>Zanvyl Krieger Mind/Brain Institute, Johns Hopkins University, Baltimore, MD 21218

5 <sup>2</sup> current location: Rockefeller Neuroscience Institute, West Virginia University, Morgantown, WV  
6 26506

7

8 **Abstract:**

9 Monocular deprivation (MD) causes an initial decrease in synaptic responses to the deprived eye  
10 in juvenile mouse primary visual cortex (V1) through Hebbian long-term depression (LTD). This  
11 is followed by a homeostatic increase, which has been attributed to synaptic scaling. However,  
12 homeostasis during other forms of visual deprivation is caused by sliding the threshold for  
13 Hebbian long-term potentiation (LTP) rather than scaling. We therefore asked whether the  
14 homeostatic increase during MD requires GluN2B-containing NMDA receptor activity, which is  
15 required to slide the plasticity threshold but not for synaptic scaling. Selective GluN2B blockade  
16 from 2-6d after monocular lid suture prevented the homeostatic increase in miniature excitatory  
17 postsynaptic current (mEPSC) amplitude in monocular V1 of acute slices and prevented the  
18 increase in visually evoked responses in binocular V1 *in vivo*. The decrease in mEPSC amplitude  
19 and visually evoked responses during the first 2d of MD also required GluN2B activity. Together,  
20 these results indicate that GluN2B-containing NMDA receptors first play a role in LTD immediately  
21 following eye closure, and then promote homeostasis during prolonged MD by sliding the plasticity  
22 threshold in favor of LTP.

23

24 **Introduction:**

25 Maintaining neuronal firing rates within an optimal range is considered essential for proper  
26 neuronal processing, and can be achieved by changing postsynaptic strength to compensate for  
27 altered spiking activity (e.g. as a result of sensory deprivation) (reviewed in Davis, 2006). For  
28 example, visual deprivation by dark exposure, intraocular tetrodotoxin injection, eyelid suture,  
29 enucleation, and retinal lesions increase synaptic strength in primary visual cortex (V1) (Desai et  
30 al., 2002; Gao et al., 2010; Goel and Lee, 2007; Goel et al., 2011; He et al., 2012; Hengen et al.,  
31 2013; Keck et al., 2013; Lambo and Turrigiano, 2013). Similarly, deafening and whisker trimming  
32 increase synaptic strength in primary auditory and somatosensory cortices, respectively  
33 (Glazewski et al., 2017; Kotak et al., 2005). However, the exact mechanisms by which  
34 homeostatic synaptic strengthening occur remain unclear.

35 Two distinct mechanisms that can homeostatically increase postsynaptic strength are the  
36 sliding threshold for plasticity and synaptic scaling. Lowering the plasticity threshold enables  
37 synaptic strengthening via Hebbian long-term potentiation (LTP), whereas non-Hebbian synaptic  
38 scaling globally increases the strength of all synapses by the same factor (Abraham and Bear,  
39 1996; Turrigiano et al., 1998). These mechanisms can be distinguished based on their  
40 dependence on GluN2B-containing NMDA receptors: increased GluN2B levels lower the  
41 threshold for Hebbian plasticity, but are not required for synaptic scaling (Philpot et al., 2001;  
42 Turrigiano et al., 1998). Previous studies indicate that visual deprivation by dark exposure  
43 increases synaptic strength in V1 by lowering the threshold for Hebbian LTP (Bridi et al., 2018;  
44 Rodriguez et al., 2019), but whether this is true for other forms of visual deprivation is unknown.

45 Monocular lid suture (monocular deprivation, MD) shifts the visual responsiveness of V1  
46 in favor of the open eye, in a process referred to as ocular dominance plasticity (ODP). In juvenile  
47 mice, MD causes an initial (within 3d) decrease in visually evoked cortical responses to the  
48 deprived eye, followed by a delayed (5-7d) homeostatic increase in responses to both eyes

49 (Frenkel and Bear, 2004; Kaneko et al., 2008; Ranson et al., 2012). These changes are paralleled  
50 by an initial decrease and delayed increase in postsynaptic strength in V1 layer 2/3 pyramidal  
51 neurons, which have been interpreted as Hebbian long-term depression (LTD) and synaptic  
52 scaling, respectively (Lambo and Turrigiano, 2013). However, GluN2B-containing NMDA  
53 receptor levels increase during the delayed phase of ODP (Chen and Bear, 2007; Cooper and  
54 Bear, 2012; Guo et al., 2017), suggesting that prolonged MD may increase synaptic strength by  
55 decreasing the threshold for LTP.

56 We therefore wished to test whether homeostasis during late ODP was caused by the  
57 sliding threshold rather than synaptic scaling. To this end, we administered a GluN2B-specific  
58 antagonist specifically during the late phase of ODP. This manipulation prevented the  
59 homeostatic increases in both mEPSC amplitude and visually evoked responses in V1. We also  
60 investigated the mechanisms of plasticity during early ODP and found that GluN2B-containing  
61 NMDA receptors are required for the initial weakening of synapses and evoked responses in V1.  
62 Together, our findings indicate that MD initially weakens cortical synapses via GluN2B-dependent  
63 LTD, then homeostatically increases synaptic strength by lowering the threshold for Hebbian LTP.

64

65 **Methods: Animals.** C57BL/6J mice were raised (no more than 5 per cage) on a 12:12 light:dark cycle  
66 with food and water *ad libitum*. Equal numbers of male and female mice were used in each group.  
67 All procedures conform to the guidelines of the U.S. Department of Health and Human Services Office  
68 of Laboratory Animal Welfare (OLAW) and were approved by the Johns Hopkins University  
69 Institutional Animal Care and Use Committee. Sample sizes were chosen to correspond with previous  
70 studies in which the effects of visual manipulation were measured. For each experiment, animals  
71 within a litter were randomly distributed across groups.

72            *Monocular deprivation:* Naïve mice underwent monocular lid suture beginning at postnatal  
73 day 25-27, and mice were age-matched across groups in all experiments. Monocular lid suture was  
74 performed under isoflurane anesthesia. For brief (2d) MD, the right eyelids were sutured together  
75 using 7-0 polypropylene suture no more than 48h prior to the experiment. For 6d MD, the margins of  
76 the upper and lower lids were trimmed prior to suture. Neosporin was applied to prevent infection.  
77 Animals were disqualified in the event of suture opening or infection.

78            *Drug administration:* Osmotic minipumps (Alzet 1007D, Durect Corp., Cupertino, CA) were  
79 filled with vehicle (20%DMSO/80% saline) or Ro 25-6981 (Cayman Chemical, Ann Arbor, MI) at a  
80 concentration to deliver 30 mg/kg/day. The pump was primed in 0.9% NaCl at 37°C for at least 6h  
81 prior to implantation. The minipump was implanted subcutaneously under isoflurane anesthesia; the  
82 incision was sutured shut and Neosporin was applied to prevent infection. Meloxicam (5mg/kg, s.c.)  
83 was administered to reduce pain and inflammation.

84            *Slice electrophysiology.* Visual cortical slices were prepared as previously described (Guo et  
85 al., 2012). 300  $\mu$ m thick slices were cut in ice-cold dissection buffer containing (in mM): 212.7  
86 sucrose, 5 KCl, 1.25 NaH<sub>2</sub>PO<sub>4</sub>, 10 MgCl<sub>2</sub>, 0.5 CaCl<sub>2</sub>, 26 NaHCO<sub>3</sub>, 10 dextrose, bubbled with 95%  
87 O<sub>2</sub>/5% CO<sub>2</sub> (pH 7.4). Slices were transferred to artificial cerebrospinal fluid (ACSF) containing (in  
88 mM): 124 NaCl, 5 KCl, 1.25 NaH<sub>2</sub>PO<sub>4</sub>, 1 MgCl<sub>2</sub>, 2 CaCl<sub>2</sub>, 26 NaHCO<sub>3</sub>, 10 dextrose, bubbled with 95%  
89 O<sub>2</sub>/5% CO<sub>2</sub> (pH 7.4). Slices were incubated in ACSF at 30°C for 30 minutes, then at room  
90 temperature for at least 30 minutes prior to recording. Visualized whole-cell recordings were obtained  
91 from pyramidal neurons in V1 layer 2/3 using 3-6 M $\Omega$  glass pipettes. Data were filtered at 2 kHz and  
92 digitized at 10 kHz using Igor Pro (WaveMetrics Inc., Lake Oswego, OR). Cells were excluded if input  
93 or series resistance changed >20% during the recording.

94            *Miniature EPSC recordings:* Miniature EPSCs were recorded from pyramidal cells in  
95 layer 2/3 of V1m. Cells were recorded in both hemispheres, with non-deprived hemisphere

96 (ipsilateral to the deprived eye) serving as control. Recordings were performed with an  
97 intracellular solution containing (in mM): 130 Cs-gluconate, 8 KCl, 1 EGTA, 10 HEPES, 4  
98 (Na)ATP, 5 QX-314 (pH adjusted to 7.25 with CsOH, 280-290 mOsm) under voltage clamp  
99 ( $V_h$ : -70 mV). 1  $\mu$ M TTX, 100 $\mu$ M APV, and 2.5  $\mu$ M gabazine were included in the bath.  
100 Events were detected and analyzed using Mini Analysis (Synaptosoft, Decatur, GA). Cells  
101 with root mean square (RMS) of membrane current noise < 2, input resistance >200M $\Omega$ , and  
102 series resistance <20 M $\Omega$  were included in the analysis. The threshold for mini detection  
103 was set at three times the RMS noise. The first 300 non-overlapping events with rise times  
104  $\leq$  3 ms were used to estimate the mEPSC amplitude distribution and produce the average  
105 mEPSC for the cell. Cells were examined for dendritic filtering by confirming that there was  
106 not a negative correlation between mEPSC amplitude and rise time.

107 *NMDA receptor current recordings.* NMDA receptor currents were recorded from V1m  
108 of both hemispheres, with the right hemisphere serving as control, or in the binocular zone  
109 of the left (deprived) hemisphere, with normally reared animals serving as control.  
110 Recordings were made using an internal pipette solution containing (in mM): 102 Cs-  
111 gluconate, 5 TEA-chloride, 3.7 NaCl, 20 HEPES, 0.3 (Na)GTP, 4 (Mg)ATP, 0.2 EGTA, 10  
112 BAPTA, 5 QX-314 (pH 7.2, ~300 mOsm) under voltage clamp ( $V_h$ =+40 mV). To isolate  
113 NMDA receptor currents and minimize multisynaptic responses, ACSF in the recording  
114 chamber contained 2.5  $\mu$ M gabazine, 25 $\mu$ M CNQX, 1 $\mu$ M glycine, 4mM CaCl<sub>2</sub>, and 4mM  
115 MgCl<sub>2</sub>. A concentric bipolar electrode (FHC, Bowdoin, ME) was placed in the middle of the  
116 cortical thickness. Stimulation intensity was set to evoke responses of at least 100 pA, and  
117 slices were stimulated every 15 seconds. Traces free of noise were averaged and NMDA  
118 receptor deactivation kinetics were measured by fitting a double exponential function to the

119 current decay of the averaged trace (Igor Pro). The weighted decay constant,  $\tau_w$ , was  
120 calculated as:  $\tau_w = \tau_f(I_f/(I_f+I_s)) + \tau_s(I_s/(I_f+I_s))$  (Guo et al., 2012; Rumbaugh and Vicini, 1999).

121  
122 *Optical Imaging of the Intrinsic Cortical Signal.* Isoflurane in O<sub>2</sub> (2-3% for induction, 0.5-1%  
123 for maintenance) was supplemented with chlorprothixene (2 mg/kg i.p.). Hair was removed  
124 using depilatory cream and the scalp was sterilized with povidone iodine. An incision was  
125 made in the scalp and lidocaine was applied to the incision margins. The exposed skull  
126 above V1 contralateral to the deprived eye was covered in 3% agarose and an 8mm round  
127 glass coverslip. The surface vasculature and intrinsic signals were imaged using a Dalsa  
128 1M30 CCD camera (Dalsa, Waterloo, Canada). Surface vasculature was visualized by  
129 illuminating the area with 555nm light. Then the camera was focused 600  $\mu$ m below the  
130 cortical surface and the area was illuminated with 610 nm light. A high refresh rate monitor  
131 (1024  $\times$  768 @120 Hz; ViewSonic, Brea, CA) was aligned in the center of the mouse's visual  
132 field 25cm in front of the eyes. Visual stimuli consisted of a white horizontal bar (2° height,  
133 20° width) restricted to the binocular visual field (-5° to +15° azimuth), on a black background.  
134 Each eye was individually presented with the stimulus moving continuously in the upward  
135 and downward direction for 7 minutes per direction. The cortical response at the stimulus  
136 frequency was extracted by Fourier analysis and maps generated for each eye were  
137 averaged. The maps for each eye were then analyzed (Matlab, Mathworks, Natick, MA).  
138 Images were smoothed by a 5 $\times$ 5 low-pass Gaussian filter and the binocular region of interest  
139 (ROI) was defined as the 70% of pixels with the highest intensity in the ipsilateral eye map.  
140 The average intensity at all pixels in the ROI was calculated for the ipsilateral and  
141 contralateral maps. For each pixel an ocular dominance value was calculated as (contra-

142 ipsi)/(contra+ipsi) and all ocular dominance values in the ROI were averaged to obtain the  
143 ODI.

144 *Statistical Analysis.* Normality was determined using the d'Agostino test. Groups with  
145 normally distributed data were compared using 2-tailed paired or unpaired *t* tests, one-way  
146 ANOVAs, or one-way repeated measures ANOVAs, as indicated. Holm-Sidak post-hoc tests  
147 were used for multiple comparisons following one-way ANOVAs. Groups that were not  
148 normally distributed were compared using nonparametric Mann-Whitney tests or ANOVAs  
149 on ranks followed by Dunn's post-hoc test for multiple comparisons (GraphPad Prism, San  
150 Diego, CA). Statistical outliers were detected (ROUT test) using pre-established criteria and  
151 excluded from analysis.

152

## 153 **Results:**

154 *GluN2B is required for homeostasis in V1m.*

155 In monocular V1 (V1m) contralateral to the deprived eye, 2d MD decreases mEPSC amplitude,  
156 followed by a homeostatic increase by 6d (Lambo and Turrigiano, 2013). 6d MD also increases  
157 the GluN2B component of the NMDA receptor response (Guo et al., 2017). We wished to  
158 determine whether this increase in GluN2B-containing NMDA receptors is required for the  
159 increase in mEPSC amplitude. To this end, we recorded mEPSCs in V1m of acute slices obtained  
160 from normal reared (NR) mice and mice that had undergone MD (Fig. 1A). In agreement with  
161 previous findings (Lambo and Turrigiano, 2013), 2 days of MD decreased mEPSC amplitude in  
162 the deprived (contralateral) hemisphere (Fig. 1B, C; Table 1). We then tested whether increased  
163 mEPSC amplitude during late-phase MD (between 2 and 6 days) required activation of GluN2B-  
164 containing NMDA receptors. After 2d MD, an osmotic minipump containing the GluN2B-specific

165 antagonist Ro 25-6981 or its vehicle was implanted subcutaneously for the remainder of the MD  
166 period (Fig. 1A). mEPSC amplitude increased above control levels in animals that received  
167 vehicle infusions (Fig. 1B, C). However, this increase was prevented by blocking GluN2B-  
168 containing NMDA receptors (Fig. 1B, C; Table 1). This GluN2B dependence is consistent with  
169 the sliding threshold mechanism underlying the homeostatic increase in mEPSC amplitude during  
170 MD.

171

172 *GluN2B is required for homeostasis in V1b.*

173 In binocular V1 (V1b), the amplitude of visually evoked deprived eye responses decreases  
174 during early MD, followed by an increase of responses to both eyes during late MD *in vivo* (Frenkel  
175 and Bear, 2004; Kaneko et al., 2008; Ranson et al., 2012). We wished to test whether the sliding  
176 threshold underlies the late increase in visual responses in V1b. We performed optical imaging  
177 of the intrinsic cortical signal in the same mice at multiple time points: baseline, 2d MD, and 6d  
178 MD (Fig. 2A). After the 2d MD imaging session, we implanted an osmotic minipump containing  
179 Ro 25-6981 or its vehicle. We measured the magnitude of cortical response to visual stimulation  
180 of each eye, and calculated the ocular dominance index at each time point (Fig. 2B-D). 2d MD  
181 induced an initial shift in ocular dominance that was caused by decreased response to the  
182 contralateral (deprived) eye, with no change in the response of the ipsilateral eye. During late-  
183 phase MD (between 2d and 6d), the magnitude of the cortical response to both the ipsilateral and  
184 contralateral eyes increased in the vehicle group, whereas Ro 25-6981 prevented this increase.  
185 We confirmed that chronic administration of Ro 25-6981 alone did not weaken responses in  
186 nondeprived V1 (Fig. 3). Together, these results indicate that the sliding threshold is required for  
187 homeostasis during late-phase MD.

188



189 *GluN2B is required for depression during early monocular deprivation.*

190 6d MD increases the GluN2B component of NMDA receptor current in V1 (Guo et al., 2017). We  
191 tested whether shorter (2d) MD was also sufficient to change NMDA receptor composition at  
192 visual cortical synapses. We recorded evoked NMDA receptor currents in the V1 layer 4-2/3  
193 pathway and found no difference in the decay constant between deprived and non-deprived  
194 cortices in either V1m or V1b (Fig. 4A, B), indicating that brief MD does not increase the GluN2B  
195 component of the NMDA receptor current.

196 Although NMDA receptor subunit composition did not change with 2d MD, pre-existing  
197 GluN2B-containing NMDA receptors at the synapse may be required for decreased synaptic  
198 strength and visual response amplitude following brief MD. We therefore tested the effects of  
199 GluN2B-specific blockade during brief MD in both V1m and V1b (Fig. 5A). We first recorded  
200 mEPSCs in V1m of acute slices from mice that received continuous vehicle or Ro 25-6981  
201 administration during 2d MD. In the vehicle group, mEPSC amplitude was significantly smaller in  
202 the deprived than in the nondeprived hemisphere (Table 2). In contrast, GluN2B blockade  
203 prevented mEPSC amplitude from decreasing in the deprived hemisphere (Fig. 5B, C; Table 2).  
204 Second, we measured the amplitude of visually evoked responses in V1b using optical imaging  
205 of the intrinsic cortical signal. Consistent with V1m, blocking GluN2B-containing NMDA receptors  
206 prevented the decrease in deprived eye response magnitude and the resulting decrease in ocular  
207 dominance index (ODI) (Fig. 5 D, E).

208

## 209 **Discussion:**

210 Here, we show that GluN2B-containing NMDA receptor activity is required for both phases  
211 of ODP: the initial depression of deprived eye responses and delayed potentiation of non-deprived  
212 eye responses. During the initial phase, levels of synaptic GluN2B-containing NMDA receptors

213 are unaltered, and pre-existing GluN2B is required for synaptic weakening. Longer MD increases  
214 synaptic GluN2B levels, which favors Hebbian LTP (Guo et al., 2017; Philpot et al., 2001). These  
215 GluN2B-containing receptors are required for delayed synaptic strengthening, indicating that  
216 decreased LTP threshold, rather than NMDA receptor-independent synaptic scaling, underlies  
217 homeostasis in this model.

218         These results are consistent with the interpretation that NMDA receptor-dependent  
219 Hebbian LTD drives the initial synaptic weakening in V1 during ODP (Fong et al., 2020; Heynen  
220 et al., 2003; Lambo and Turrigiano, 2013). Our results further demonstrate a role specifically for  
221 GluN2B-containing NMDA receptors in the weakening of deprived eye responses, in line with LTD  
222 mechanisms in hippocampus and timing-dependent LTD in V1 (Fox et al., 2006; Ge et al., 2010;  
223 Guo et al., 2012; Izumi et al., 2006; Liu et al., 2004). Although GluN2B-containing NMDA  
224 receptors are necessary for LTD during ODP, additional mechanisms, such as endocannabinoid  
225 signaling, are also required (Liu et al., 2008); how these mechanisms interact to weaken deprived  
226 eye responses remains to be seen.

227         Homeostatic strengthening via the sliding threshold occurs during multiple types of visual  
228 deprivation, including MD (Fig. 1, 2) and dark exposure (Bridi et al., 2018). During dark exposure,  
229 the sliding threshold is engaged by altered firing patterns, whereas synaptic scaling is thought to  
230 be caused by changes in overall spiking and/or synaptic activity (Bridi et al., 2018; Fong et al.,  
231 2015; Turrigiano et al., 1998). Like dark exposure, MD has moderate effects on overall firing rates  
232 in V1, supporting the idea that homeostasis during visual deprivation depends more on activity  
233 patterns than spike rate (Aton et al., 2013; Fiser et al., 2004; Hengen et al., 2013; Torrado  
234 Pacheco et al., 2019). In contrast, synaptic scaling depends on dramatic reductions in firing rate  
235 that can be achieved by pharmacological or chemogenetic interventions *in vivo*, in line with the  
236 hypothesis that distinct homeostatic mechanisms operate within different activity ranges (Bridi et  
237 al., 2018; Wen and Turrigiano, 2021).

238

239 *Mechanisms of homeostasis*

240           Strengthening of visual responses during sensory deprivation requires molecular  
241 mechanisms directly involved in metaplasticity and LTP, including GluA1-containing AMPA  
242 receptors and (GluN2B-containing) NMDA receptors (Fig 2; Ranson et al., 2013; Rodriguez et  
243 al., 2019; but see Toyoizumi et al., 2014). However, several mechanisms implicated in synaptic  
244 upscaling are also required, warranting closer examination of how their complex roles *in vivo*  
245 might contribute to homeostasis.

246           Multiple types of visual deprivation cause rapid cortical disinhibition onto principal cells  
247 (Aton et al., 2013; Gao et al., 2017; Hengen et al., 2013; Kuhlman et al.; Severin et al., 2021; van  
248 Versendaal et al., 2012). The altered activity patterns that result from disinhibition (due to  
249 increased spontaneous, decorrelated firing) are thought to slide the plasticity threshold in favor of  
250 LTP (Bridi et al., 2018). Retinoic acid and tumor necrosis factor  $\alpha$  signaling can both mediate  
251 disinhibition (Pribiag and Stellwagen, 2013; Zhong et al., 2018). Therefore, these mechanisms  
252 may contribute to homeostasis during sensory deprivation *in vivo* by promoting LTP, distinct from  
253 their roles in scaling *in vitro* (Aoto et al., 2008; Kaneko et al., 2008; Stellwagen and Malenka,  
254 2006). It would be of great interest to determine whether these mechanisms are required for the  
255 increase in GluN2B levels during sensory deprivation.

256           In light of our findings we speculate that, once the plasticity threshold is lowered, LTP  
257 maintenance is required for the continued expression of homeostasis during sensory deprivation.  
258 Some molecular processes play dual roles in LTP maintenance and scaling, which may explain  
259 why mechanisms required for scaling *in vitro* are also necessary for homeostasis during sensory  
260 deprivation *in vivo*. For example, interfering with GluA2-mediated AMPA receptor trafficking and  
261 activity regulated cytoskeleton-associated protein (Arc) prevent homeostasis during MD (Lambo

262 and Turrigiano, 2013; McCurry et al., 2010). These findings have been attributed to the roles of  
263 GluA2 and Arc in synaptic scaling (Gainey et al., 2009; Gao et al., 2010; Shepherd et al., 2006),  
264 but may instead be due to their involvement in LTP maintenance (Guzowski et al., 2000; Plath et  
265 al., 2006; Shi et al., 2001). In line with this hypothesis, Arc KO mice are also deficient in stimulus-  
266 selective response potentiation, a form of visual cortical plasticity that engages LTP mechanisms  
267 (Frenkel et al., 2006; McCurry et al., 2010).

268

269 The current study in juvenile mice reveals multiple roles for GluN2B-containing NMDA  
270 receptors in visual cortical plasticity. Molecular mechanisms of synaptic weakening and  
271 homeostatic strengthening in V1 vary across developmental stages (Ranson et al., 2012, 2013),  
272 cortical layers (Crozier et al., 2007; Fong et al., 2020; Liu et al., 2008), and neuronal  
273 subpopulations (Pandey et al., 2022). Determining how GluN2B interacts with each of these  
274 distinct processes will shed light on how the cortex adapts to altered sensory input across the  
275 lifespan.

276

277

278

279 **Competing interests:** none.

280 **References:**

281 Abraham, W.C., and Bear, M.F. (1996). Metaplasticity: The plasticity of synaptic plasticity.

282 *Trends Neurosci* 19 DOI: 10.1016/S0166-2236(96)80018-X.

283 Aoto, J., Nam, C.I., Poon, M.M., Ting, P., and Chen, L. (2008). Synaptic signaling by all-trans

284 retinoic acid in homeostatic synaptic plasticity. *Neuron* 60, 308–320. DOI:

285 10.1016/j.neuron.2008.08.012.

286 Aton, S.J., Broussard, C., Dumoulin, M., Seibt, J., Watson, A., and Coleman, T. (2013). Visual  
287 experience and subsequent sleep induce sequential plastic changes in putative inhibitory and  
288 excitatory cortical neurons. *Proc Natl Acad Sci USA* 110, 3101–3106. DOI:  
289 10.1073/pnas.1208093110.

290 Bridi, M.C.D., De Pasquale, R., Lantz, C.L., Gu, Y., Borrell, A., Choi, S.Y., He, K., Tran, T.,  
291 Hong, S.Z., Dykman, A., et al. (2018). Two distinct mechanisms for experience-dependent  
292 homeostasis. *Nat Neurosci* 21, 843–850. DOI: 10.1038/s41593-018-0150-0.

293 Chen, W.S., and Bear, M.F. (2007). Activity-dependent regulation of NR2B translation  
294 contributes to metaplasticity in mouse visual cortex. *Neuropharmacology* 52, 200–214. DOI:  
295 10.1016/j.neuropharm.2006.07.003.

296 Cooper, L.N., and Bear, M.F. (2012). The BCM theory of synapse modification at 30: Interaction  
297 of theory with experiment. *Nat Rev Neurosci* 13, 798–810. DOI: 10.1038/nrn3353.

298 Crozier, R.A., Wang, Y., Liu, C., and Bear, M.F. (2007). Deprivation-induced synaptic  
299 depression by distinct mechanisms in different layers of mouse visual cortex. *Proc Natl Acad Sci*  
300 *USA* 104, 1383–1388. DOI: 10.1073/pnas.0609596104.

301 Davis, G.W. (2006). Homeostatic control of neural activity: From phenomenology to molecular  
302 design. *Annu Rev Neurosci* 29, 307–323. DOI: 10.1146/annurev.neuro.28.061604.135751.

303 Desai, N.S., Cudmore, R.H., Nelson, S.B., and Turrigiano, G.G. (2002). Critical periods for  
304 experience- dependent synaptic scaling in visual cortex. *Nat Neurosci* 5, 783–790. DOI:  
305 10.1038/nn878.

306 Fiser, J., Chiu, C., and Weliky, M. (2004). Small modulation of ongoing cortical dynamics by  
307 sensory input during natural vision. *Nature* 431, 573–578. DOI: 10.1038/nature02953.1.

308 Fong, M., Newman, J.P., Potter, S.M., and Wenner, P. (2015). Upward synaptic scaling is  
309 dependent on neurotransmission rather than spiking. *Nat Commun* 6, 6339. DOI:  
310 10.1038/ncomms7339.

311 Fong, M., Finnie, P.S.B., Kim, T., Thomazeau, A., Kaplan, E.S., Cooke, S.F., and Bear, M.F.  
312 (2020). Distinct laminar requirements for NMDA receptors in experience-dependent visual  
313 cortical plasticity. *Cereb Cortex* 30, 2555–2572. DOI: 10.1093/cercor/bhz260.

314 Fox, C.J., Russell, K.I., Wang, Y.T., and Christie, B.R. (2006). Contribution of NR2A and NR2B  
315 NMDA subunits to bidirectional synaptic plasticity in the hippocampus in vivo. *Hippocampus* 16,  
316 907–915. DOI: 10.1002/hipo.20230.

317 Frenkel, M.Y., and Bear, M.F. (2004). How monocular deprivation shifts ocular dominance in  
318 visual cortex of young mice. *Neuron* 44, 917–923. DOI: 10.1016/j.neuron.2004.12.003.

319 Frenkel, M.Y., Sawtell, N.B., Diogo, A.C.M., Yoon, B., Neve, R.L., and Bear, M.F. (2006).  
320 Instructive effect of visual experience in mouse visual cortex. *Neuron* 51, 339–349. DOI:  
321 10.1016/j.neuron.2006.06.026.

322 Gainey, M.A., Hurvitz-Wolff, J.R., Lambo, M.E., and Turrigiano, G.G. (2009). Synaptic scaling  
323 requires the GluR2 subunit of the AMPA receptor. *J Neurosci* 29, 6479–6489. DOI:  
324 10.1523/JNEUROSCI.3753-08.2009.

325 Gao, M., Sossa, K., Song, L., Errington, L., Cummings, L., Hwang, H., Kuhl, D., Worley, P., and  
326 Lee, H.-K. (2010). A specific requirement of Arc/Arg3.1 for visual experience-induced  
327 homeostatic synaptic plasticity in mouse primary visual cortex. *J Neurosci* 30, 7168–7178. DOI:  
328 10.1523/JNEUROSCI.1067-10.2010.

329 Gao, M., Whitt, J.L., Huang, S., Lee, A., Mihalas, S., Kirkwood, A., and Lee, H.-K. (2017).  
330 Experience-dependent homeostasis of ‘noise’ at inhibitory synapses preserves information

331 coding in adult visual cortex. *Phil Trans R Soc B* 372, 20160156. DOI:

332 Ge, Y., Dong, Z., Bagot, R.C., Howland, J.G., Phillips, A.G., Wong, T.P., and Wang, Y.T.  
333 (2010). Hippocampal long-term depression is required for the consolidation of spatial memory.  
334 *Proc Natl Acad Sci USA* 107, 16697–16702. DOI: 10.1073/pnas.1008200107.

335 Glazewski, S., Greenhill, S., and Fox, K. (2017). Time-course and mechanisms of homeostatic  
336 plasticity in layers 2/3 and 5 of the barrel cortex. *Phil Trans R Soc B* 372, 20160150. DOI:  
337 10.1098/rstb.2016.0150.

338 Goel, A., and Lee, H. (2007). Persistence of experience-induced homeostatic synaptic plasticity  
339 through adulthood in superficial layers of mouse visual cortex. *J Neurosci* 27, 6692–6700. DOI:  
340 10.1523/JNEUROSCI.5038-06.2007.

341 Goel, A., Xu, L.W., Snyder, K.P., Song, L., Goenaga-Vazquez, Y., Megill, A., Takamiya, K.,  
342 Hugarir, R.L., and Lee, H.-K. (2011). Phosphorylation of AMPA receptors is required for  
343 sensory deprivation-induced homeostatic synaptic plasticity. *PLoS One* 6, e18264. DOI:  
344 10.1371/journal.pone.0018264.

345 Guo, Y., Huang, S., Pasquale, R. De, McGehrin, K., Lee, H.-K., Zhao, K., and Kirkwood, A.  
346 (2012). Dark exposure extends the integration window for spike-timing-dependent plasticity. *J*  
347 *Neurosci* 32, 15027–15035. DOI: 10.1523/JNEUROSCI.2545-12.2012.

348 Guo, Y., Zhang, W., Chen, X., Fu, J., Cheng, W., Song, D., Qu, X., Yang, Z., and Zhao, K.  
349 (2017). Timing-dependent LTP and LTD in mouse primary visual cortex following different visual  
350 deprivation models. *PLoS One* 12, e0176603. DOI: 10.1371/journal.pone.0176603.

351 Guzowski, J.F., Lyford, G.L., Stevenson, G.D., Houston, F.P., McGaugh, J.L., Worley, P.F., and  
352 Barnes, C.A. (2000). Inhibition of activity-dependent Arc protein expression in the rat  
353 hippocampus impairs the maintenance of long-term potentiation and the consolidation of long-

- 354 term memory. *J Neurosci* 20, 3993–4001. DOI: 10.1523/JNEUROSCI.20-11-03993.2000.
- 355 He, K., Petrus, E., Gammon, N., and Lee, H.-K. (2012). Distinct sensory requirements for  
356 unimodal and cross-modal homeostatic synaptic plasticity. *J Neurosci* 32, 8469–8474. DOI:  
357 10.1523/JNEUROSCI.1424-12.2012.
- 358 Hengen, K.B., Lambo, M.E., Van Hooser, S.D., Katz, D.B., and Turrigiano, G.G. (2013). Firing  
359 rate homeostasis in visual cortex of freely behaving rodents. *Neuron* 80, 335–342. DOI:  
360 10.1016/j.neuron.2013.08.038.
- 361 Heynen, A.J., Yoon, B.-J., Liu, C.-H., Chung, H.J., Hugarir, R.L., and Bear, M.F. (2003).  
362 Molecular mechanism for loss of visual cortical responsiveness following brief monocular  
363 deprivation. *Nat Neurosci* 6, 854–862. DOI: 10.1038/nn1100.
- 364 Izumi, Y., Auberson, Y.P., and Zorumski, C.F. (2006). Zinc modulates bidirectional hippocampal  
365 plasticity by effects on NMDA receptors. *J Neurosci* 26, 7181–7188. DOI:  
366 10.1523/JNEUROSCI.1258-06.2006.
- 367 Kaneko, M., Stellwagen, D., Malenka, R.C., and Stryker, M.P. (2008). Tumor necrosis factor- $\alpha$   
368 mediates one component of competitive, experience-dependent plasticity in developing visual  
369 cortex. *Neuron* 58, 673–680. DOI: 10.1016/j.neuron.2008.04.023.
- 370 Keck, T., Keller, G.B., Jacobsen, R.I., Eysel, U.T., Bonhoeffer, T., and Hu, M. (2013). Synaptic  
371 scaling and homeostatic plasticity in the mouse visual cortex in vivo. *Neuron* 3, 327–334. DOI:  
372 10.1016/j.neuron.2013.08.018.
- 373 Kotak, V.C., Fujisawa, S., Lee, F.A., Karthikeyan, O., Aoki, C., and Sanes, D.H. (2005). Hearing  
374 loss raises excitability in the auditory cortex. *J Neurosci* 25, 3908–3918. DOI:  
375 10.1523/JNEUROSCI.5169-04.2005.
- 376 Kuhlman, S.J., Olivas, N.D., Tring, E., Ikrar, T., Xu, X., and Trachtenberg, J.T. plasticity in the



- 377 visual cortex. *Nature* 1–7. DOI: 10.1038/nature12485.
- 378 Lambo, M.E., and Turrigiano, G.G. (2013). Synaptic and intrinsic homeostatic mechanisms  
379 cooperate to increase L2/3 pyramidal neuron excitability during a late phase of critical period  
380 plasticity. *J Neurosci* 33, 8810–8819. DOI: 10.1523/JNEUROSCI.4502-12.2013.
- 381 Liu, C.-H., Heynen, A.J., Shuler, M.G.H., and Bear, M.F. (2008). Cannabinoid receptor blockade  
382 reveals parallel plasticity mechanisms in different layers of mouse visual cortex. *Neuron* 58,  
383 340–345. DOI: 10.1016/j.neuron.2008.02.020.
- 384 Liu, L., Wong, T.P., Pozza, M.F., Lingenhoehl, K., Wang, Y., Sheng, M., Auberson, Y.P., and  
385 Wang, Y.T. (2004). Role of NMDA receptor subtypes in governing the direction of hippocampal  
386 synaptic plasticity. *Science* 304, 1021–1024. DOI: 10.1126/science.1096615.
- 387 McCurry, C.L., Shepherd, J.D., Tropea, D., Wang, K.H., Bear, M.F., and Sur, M. (2010). Loss of  
388 Arc renders the visual cortex impervious to the effects of sensory experience or deprivation. *Nat*  
389 *Neurosci* 13, 450–457. DOI: 10.1038/nn.2508.
- 390 Pandey, A., Hardingham, N., and Fox, K. (2022). Differentiation of Hebbian and homeostatic  
391 plasticity mechanisms within layer 5 visual cortex neurons. *Cell Rep* 39, 110892. DOI:  
392 10.1016/j.celrep.2022.110892.
- 393 Philpot, B.D., Sekhar, A.K., Shouval, H.Z., and Bear, M.F. (2001). Visual experience and  
394 deprivation bidirectionally modify the composition and function of NMDA receptors in visual  
395 cortex. *Neuron* 29, 157–169. DOI: 10.1016/s0896-6273(01)00187-8.
- 396 Plath, N., Ohana, O., Dammermann, B., Errington, M.L., Schmitz, D., Gross, C., Mao, X.,  
397 Engelsberg, A., Mahlke, C., Welzl, H., et al. (2006). Arc/Arg3.1 is essential for the consolidation  
398 of synaptic plasticity and memories. *Neuron* 52, 437–444. DOI: 10.1016/j.neuron.2006.08.024.
- 399 Pribiag, H., and Stellwagen, D. (2013). TNF-alpha downregulates inhibitory neurotransmission

400 through protein phosphatase 1-dependent trafficking of GABA A receptors. *J Neurosci* 33,  
401 15879–15893. DOI: 10.1523/JNEUROSCI.0530-13.2013.

402 Ranson, A., Cheetham, C.E.J., Fox, K., and Sengpiel, F. (2012). Homeostatic plasticity  
403 mechanisms are required for juvenile , but not adult , ocular dominance plasticity. *Proc Natl*  
404 *Acad Sci USA* 109, 1311–1316. DOI: 10.1073/pnas.1112204109.

405 Ranson, A., Sengpiel, F., and Fox, K. (2013). The role of GluA1 in ocular dominance plasticity in  
406 the mouse visual cortex. *J Neurosci* 33, 15220–15225. DOI: 10.1523/JNEUROSCI.2078-  
407 13.2013.

408 Rodriguez, G., Mesik, L., Gao, M., Parkins, S., Saha, R., and Lee, H.-K. (2019). Disruption of  
409 NMDAR function prevents normal experience-dependent homeostatic synaptic plasticity in  
410 mouse primary visual cortex. *J Neurosci* 39, 7664–7673. DOI:  
411 [doi.org/10.1523/JNEUROSCI.2117-18.2019](https://doi.org/10.1523/JNEUROSCI.2117-18.2019).

412 Rumbaugh, G., and Vicini, S. (1999). Distinct synaptic and extrasynaptic NMDA receptors in  
413 developing cerebellar granule neurons. *J Neurosci* 19, 10603–10610. DOI:  
414 10.1523/JNEUROSCI.19-24-10603.1999.

415 Severin, D., Hong, S.Z., Roh, S.-E., Huang, S., Zhou, J., Bridi, M.C.D., Hong, I., Murase, S.,  
416 Robertson, S., Haberman, R.P., et al. (2021). All-or-none disconnection of pyramidal inputs onto  
417 parvalbumin-positive interneurons gates ocular dominance plasticity. *Proc Natl Acad Sci USA*  
418 118, e105388118. DOI: 10.1073/pnas.2105388118.

419 Shepherd, J.D., Rumbaugh, G., Wu, J., Chowdhury, S., Plath, N., Kuhl, D., Hugarir, R.L., and  
420 Worley, P.F. (2006). Arc/Arg3.1 mediates homeostatic synaptic scaling of AMPA receptors.  
421 *Neuron* 52, 475–484. DOI: 10.1016/j.neuron.2006.08.034.

422 Shi, S.-H., Hayashi, Y., Esteban, J.A., and Malinow, R. (2001). Subunit-specific rules governing

- 423 AMPA receptor trafficking to synapses in hippocampal pyramidal neurons. *Cell* *105*, 331–343.  
424 DOI: 10.1016/S0092-8674(01)00321-X.
- 425 Stellwagen, D., and Malenka, R.C. (2006). Synaptic scaling mediated by glial TNF- $\alpha$ . *Nature*  
426 *440*, 1054–1059. DOI: 10.1038/nature04671.
- 427 Torrado Pacheco, A., Tilden, E.I., Grutzner, S.M., Lane, B.J., Wu, Y., Hengen, K.B., Gjorgjieva,  
428 J., and Turrigiano, G.G. (2019). Rapid and active stabilization of visual cortical firing rates  
429 across light–dark transitions. *Proc Natl Acad Sci USA* *116*, 18068–18077. DOI:  
430 10.1073/pnas.1906595116.
- 431 Toyozumi, T., Kaneko, M., Stryker, M.P., and Miller, K.D. (2014). Modeling the dynamic  
432 interaction of Hebbian and homeostatic plasticity. *Neuron* *84*, 497–510. DOI:  
433 10.1016/j.neuron.2014.09.036.
- 434 Turrigiano, G.G., Leslie, K.R., Desai, N.S., Rutherford, L.C., and Nelson, S.B. (1998). Activity-  
435 dependent scaling of quantal amplitude in neocortical neurons. *Nature* *391*, 892–896. DOI:  
436 10.1038/36103.
- 437 van Versendaal, D., Rajendran, R., Saiepour, M.H., Klooster, J., Smit-Rigter, L., Sommeijer, J.-  
438 P., De Zeeuw, C.I., Hofer, S.B., Heimel, J.A., and Levelt, C.N. (2012). Elimination of inhibitory  
439 synapses is a major component of adult ocular dominance plasticity. *Neuron* *74*, 374–383. DOI:  
440 10.1016/j.neuron.2012.03.015.
- 441 Wen, W., and Turrigiano, G.G. (2021). Developmental regulation of homeostatic plasticity in  
442 mouse primary visual cortex. *J Neurosci* *41*, 9891–9905. DOI: 10.1523/JNEUROSCI.1200-  
443 21.2021.
- 444 Zhong, L.R., Chen, X., Park, E., Sudhof, T.C., and Chen, L. (2018). Retinoic acid receptor RAR  
445  $\alpha$ -dependent synaptic signaling mediates homeostatic synaptic plasticity at the inhibitory

446 synapses of mouse visual cortex. *J Neurosci* 38, 10454–10466. DOI:  
447 10.1523/JNEUROSCI.1133-18.2018.

448

#### 449 **Figure Legends.**

450 **Figure 1.** GluN2B-containing NMDA receptors are required for homeostasis during late-phase  
451 ocular dominance plasticity. (A) Experimental design. The right eyelid was sutured shut to initiate  
452 an ocular dominance shift. After two days, a minipump containing the GluN2B-specific antagonist  
453 Ro 25-6981 or its vehicle was implanted subcutaneously. Arrowheads indicate times at which  
454 acute brain slices were collected for mEPSC recording in the monocular zone of each  
455 hemisphere. (B) mEPSC amplitude in the contralateral (deprived) hemisphere is expressed as  
456 percentage of ipsilateral (control) hemisphere in the same animal. Left: compared to normally  
457 reared (NR) animals, mEPSC amplitude decreased after 2d MD and then increased above  
458 baseline levels after 6d MD with vehicle. Ro 25-6981 prevented mEPSC amplitude from  
459 increasing (ANOVA  $F_{(3, 106)}=12.8$ ,  $P<0.0001$ ; Holm-Sidak post-hoc  $P$  values indicated). Data are  
460 shown as mean $\pm$ SEM and sample size is indicated as (cells, mice). (C) Averaged mEPSC traces  
461 from each hemisphere. Traces normalized to peak amplitude (overlay) show no difference in  
462 kinetics (see Table 1).

463

464 **Figure 2.** GluN2B-containing NMDA receptors are required for homeostasis during late-phase  
465 ocular dominance plasticity. (A) Experimental design. The right eyelid was sutured shut to initiate  
466 an ocular dominance shift. After two days, a minipump containing the GluN2B-specific antagonist  
467 Ro 25-6981 or its vehicle was implanted subcutaneously. Arrowheads indicate optical imaging  
468 sessions. The same animals were imaged at all three time points. (B) Representative images.  
469 (C) In both groups, there was an initial decrease in ODI at 2d MD (Vehicle: RM ANOVA

470  $F_{(1.2,7.4)}=10.5$ ,  $P=0.01$ ; Ro: RM ANOVA  $F_{(1.6, 10.9)}=22.4$ ,  $P=0.0002$ ). This was caused by decreased  
471 contralateral eye responses (Vehicle: RM ANOVA  $F_{(1.8, 10.7)}=7.6$ ,  $P=0.01$ ; Ro: RM ANOVA  
472  $F_{(1.7,11.8)}=11$ ,  $P=0.003$ ). Ro 25-6981 treatment over the subsequent 4d MD blocked the increase  
473 in contralateral and ipsilateral response magnitude (Vehicle ipsi: RM ANOVA  $F_{(1.2, 7)}=15.7$ ,  
474  $P=0.005$ ; Ro: RM ANOVA  $F_{(1.8, 12.6)}=0.1$ ,  $P=0.9$ ).  $P$  values indicate Holm-Sidak post-hoc  
475 comparisons. (D) Over the drug administration period, contralateral ( $t_{(14)}=3.2$ ) and ipsilateral  
476 ( $t_{(14)}=2.5$ ) cortical responses changed significantly less in Ro 25-6981- than vehicle-treated  
477 animals (2-tailed  $t$  tests). There was no effect on the ODI (Mann-Whitney test,  $U=27$ ). Data are  
478 shown as mean $\pm$ SEM. N indicates number of mice.

479

480 **Figure 3.** Ro 25-6981 does not affect map strength in non-remodeling V1. (A) Experimental  
481 design. Monocular cortex in the control hemisphere (ipsilateral to the deprived eye) was imaged  
482 while visually stimulating the monocular zone of the open eye. (B) Representative maps. (C) 4d  
483 of Ro 25-6981 treatment did not decrease map strength ( $t$  test  $t_{(17)}=1.01$ ). Data are shown as  
484 mean $\pm$ SEM and N indicates number of mice.

485

486 **Figure 4.** The GluN2B component of the NMDA response does not increase over 2d MD. (A)  
487 Top: Average evoked NMDA receptor responses in the monocular zone of control (ipsilateral;  
488 black) and deprived (contralateral; dashed grey) hemispheres obtained from the same animals.  
489 Bottom: The decay constant did not differ between hemispheres (Mann-Whitney  $U=577$ ). (B)  
490 Top: Averaged evoked NMDA receptor responses in the binocular zone of normally reared (NR)  
491 animals (black), and in the deprived hemisphere of a second group of animals after 2d MD  
492 (dashed grey). Bottom: The decay constant did not differ between conditions ( $t$  test  $t_{(50)}=0.8$ ).  
493 Data are shown as mean $\pm$ SEM and sample size is indicated as (cells, mice).

494

495 **Figure 5.** GluN2B-containing NMDA receptors are required for depression of deprived eye  
496 responses following brief MD. (A) Experimental design. Mice were implanted subcutaneously  
497 with a minipump containing Ro 25-6981 or its vehicle and the right eyelid was sutured shut for  
498 two days. (B) Averaged mEPSC traces, recorded in the monocular zone of each hemisphere.  
499 Sample size is indicated as (cells, mice). (C) mEPSC amplitude in the contralateral hemisphere  
500 is expressed as percentage of ipsilateral hemisphere in the same animal. GluN2B blockade  
501 prevented the decrease in mEPSC amplitude ( $t$  test  $t_{(43)}=2.8$ ). Data are shown as mean $\pm$ SEM.  
502 Kinetics and recording conditions are reported in Table 2. (D) Representative images of visual  
503 responses in the binocular zone, measured longitudinally by optical imaging of the intrinsic cortical  
504 signal. (E) Contralateral eye response magnitude and ODI decreased in vehicle (Contra:  $t_{(6)}=4.5$ ;  
505 ODI:  $t_{(6)}=3.6$ ) but not Ro 25-6981 ( $t_{(10)}=1.0$ ,  $t_{(10)}=1.5$ ) treated mice over 2d MD. Ipsilateral eye  
506 responses were unchanged in both groups (Vehicle:  $t_{(6)}=0.7$ ; Ro  $t_{(10)}=0.7$ ). Comparisons were  
507 made using 2-tailed paired  $t$  tests. (F) The decrease in contralateral eye response and ODI over  
508 the drug administration period was greater in vehicle- than Ro 25-6981-treated animals (Contra:  
509  $t_{(16)}=2.4$ ; ODI:  $t_{(16)}=3.5$ ). Change in ipsilateral eye response did not differ between groups  
510 ( $t_{(16)}=0.16$ ). Comparisons were made using 2-tailed  $t$  tests. Data are shown as mean $\pm$ SEM and  
511 N indicates number of mice.

512

513

FIGURE 1.

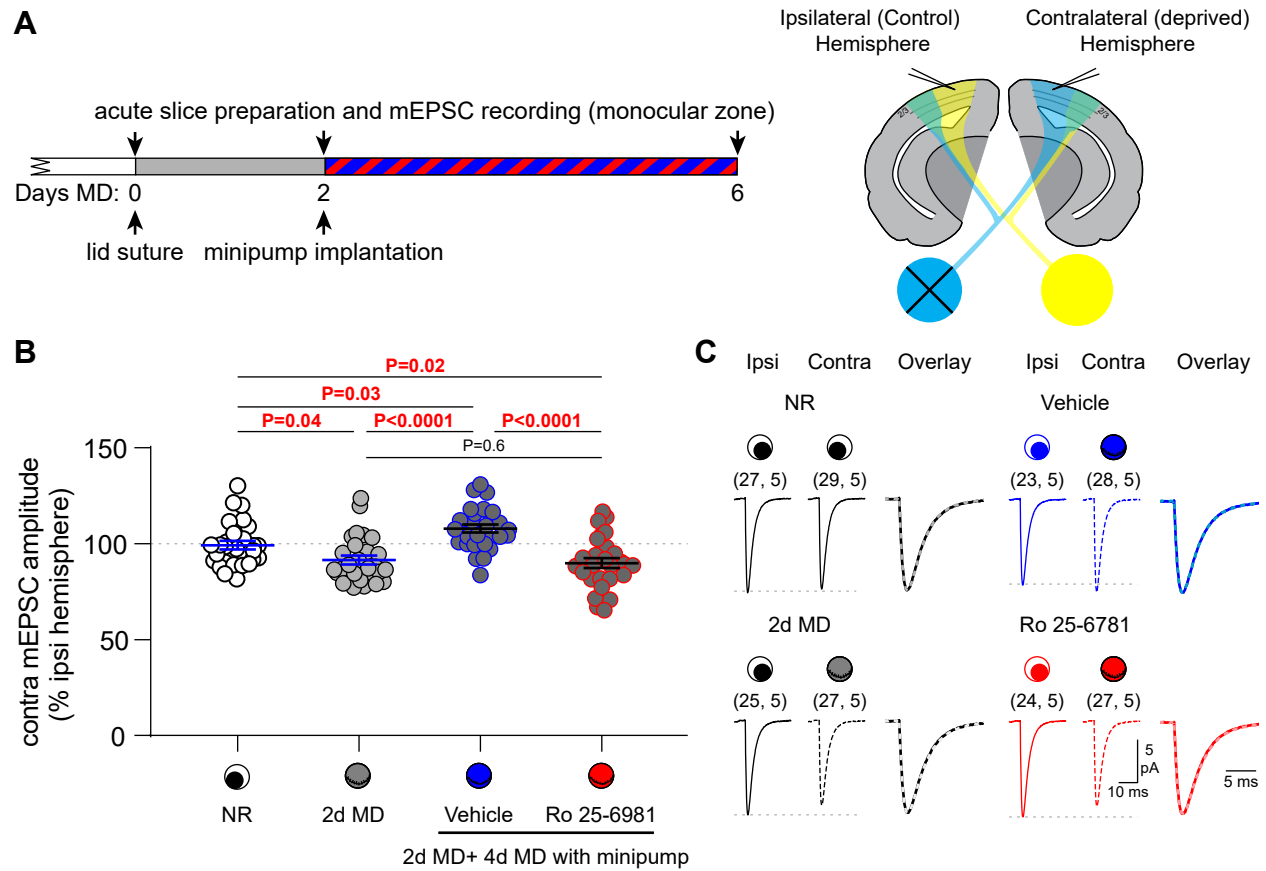

FIGURE 2.

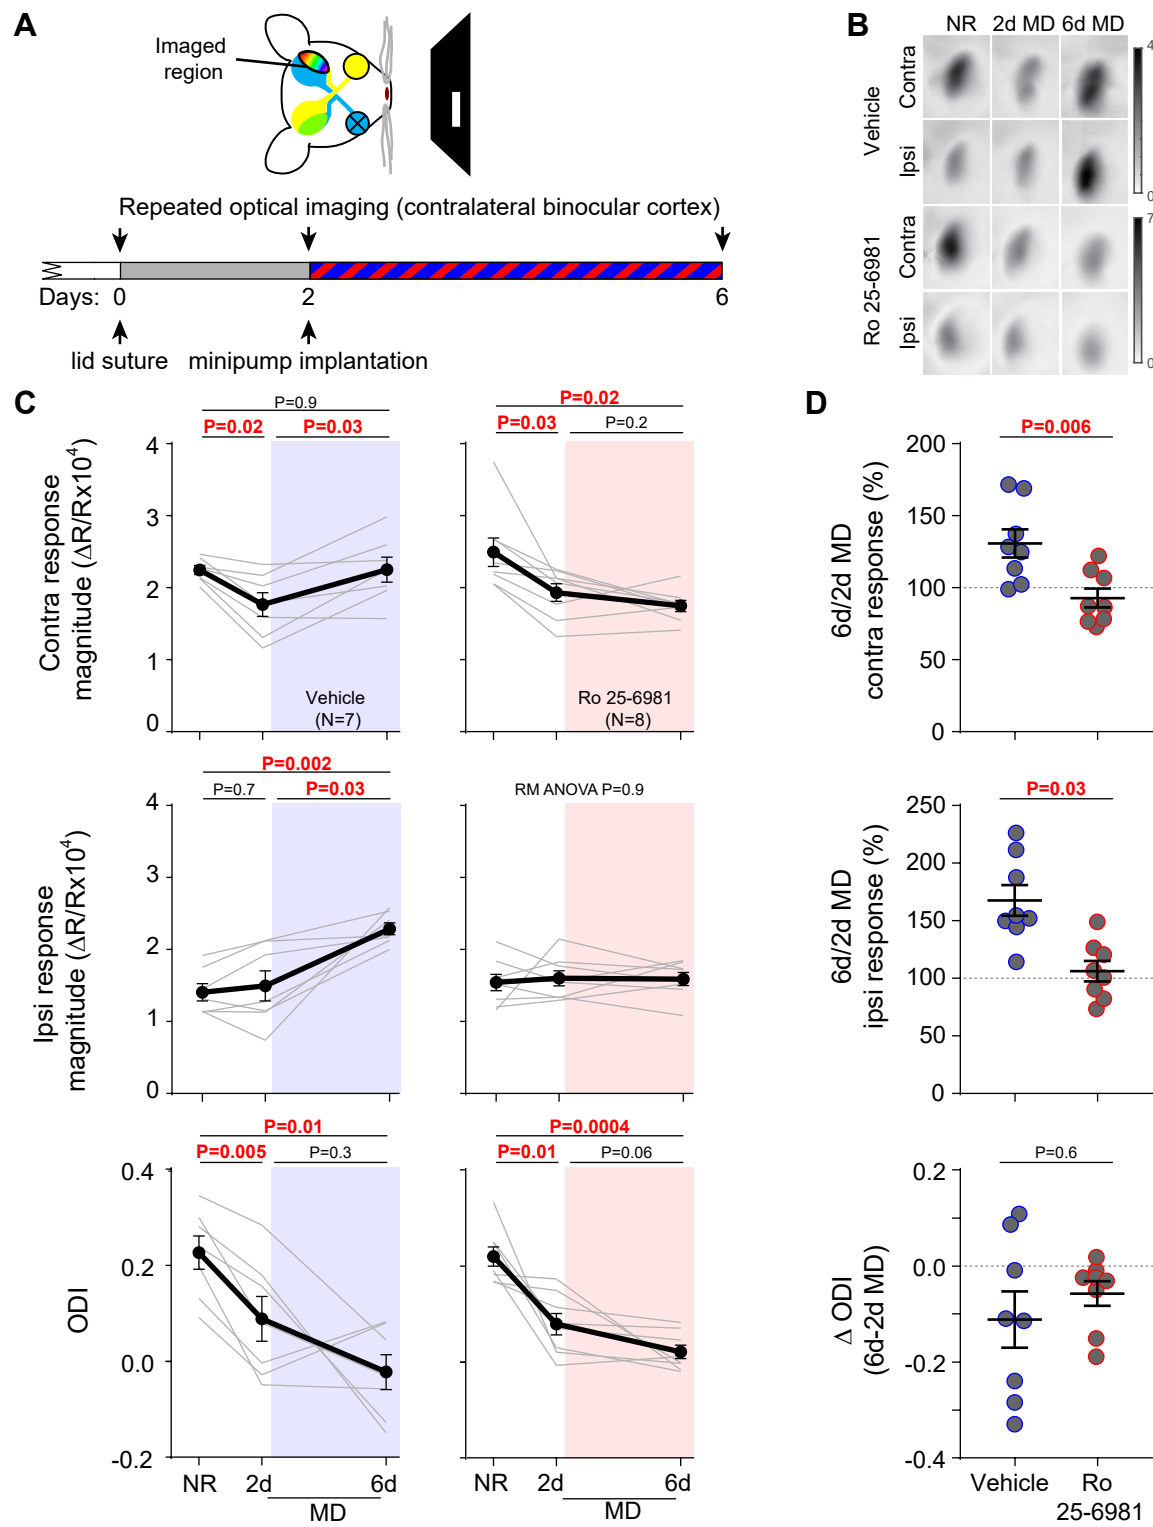



FIGURE 3.

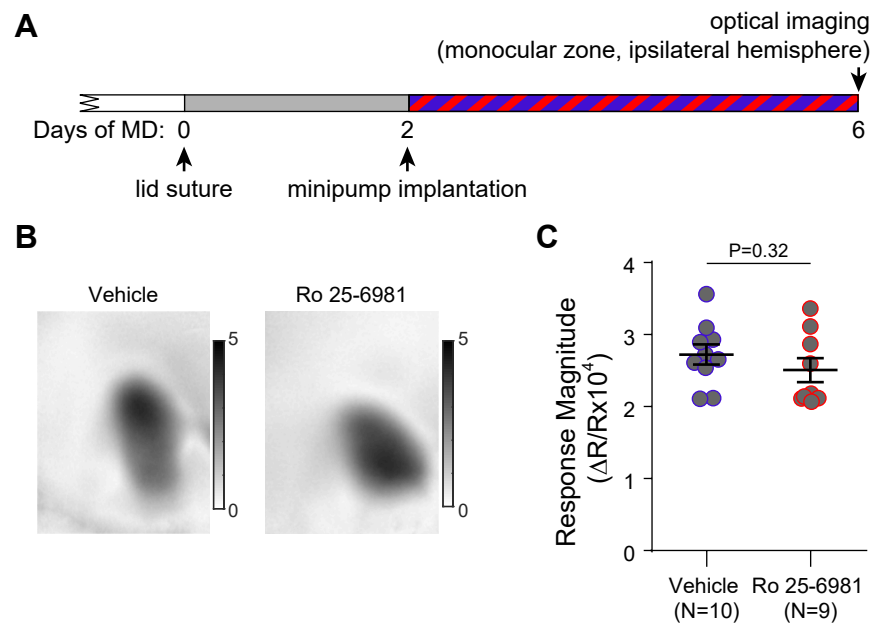

FIGURE 4.

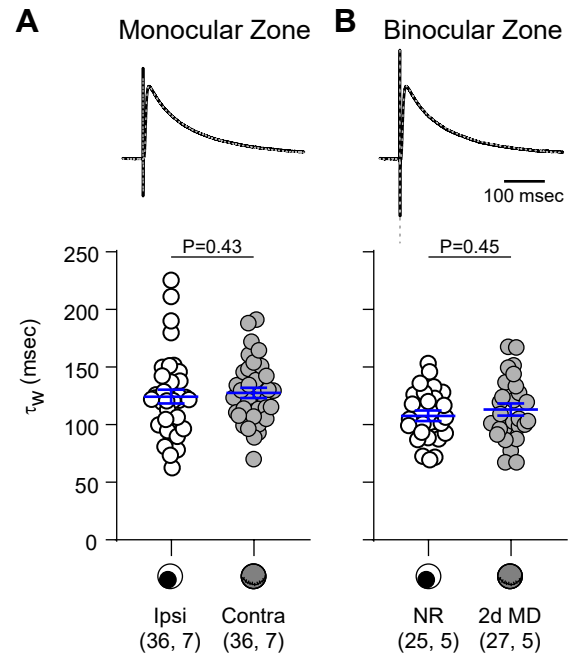

FIGURE 5.

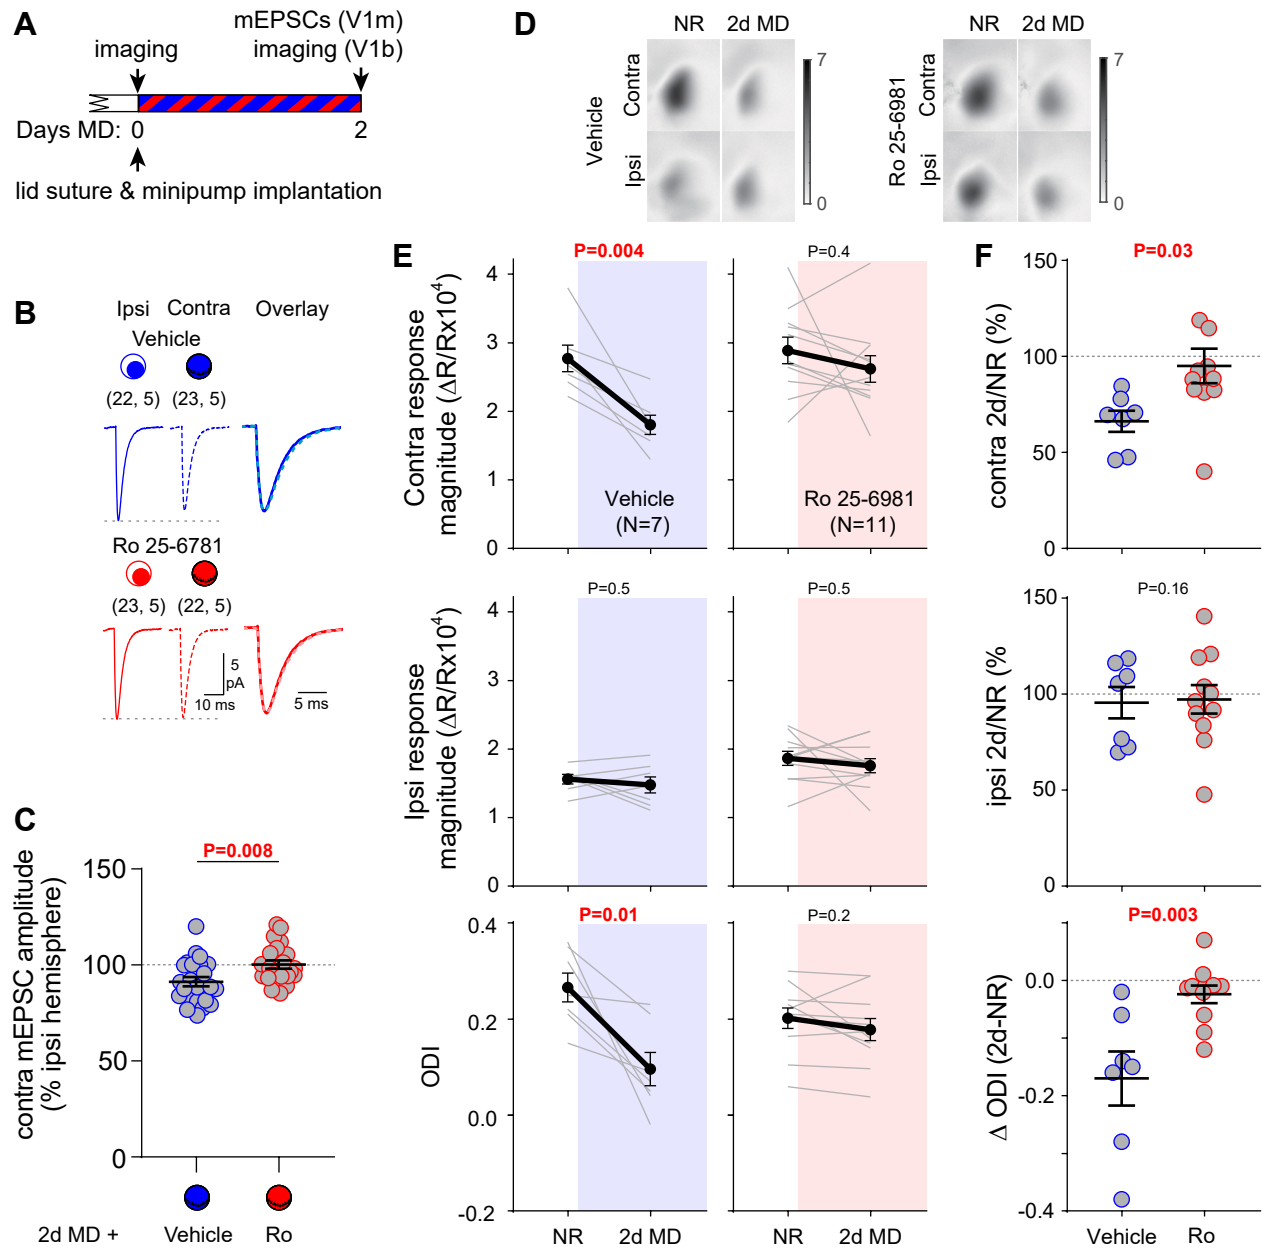

**Table 1.** mEPSC properties and recording conditions in NR, 2d MD, 6dMD+vehicle, and 6dMD+Ro 25-6981 groups (related to Figure 1). For each treatment, data were compared between control (ipsi) and deprived (contra) hemispheres using 2-tailed unpaired *t* tests (*t* statistic reported) or Mann-Whitney tests (*U* statistic reported), as indicated. Bold values indicate significant differences. Data are shown as mean±SEM. N is reported as cells, mice.

|                         |           | Amplitude<br>(pA)              | Frequency<br>(Hz)              | Rise<br>(ms)                   | Decay<br>(ms)                  | Rin<br>(MW)     | Rs<br>(MW)                    | RMS                             | N     |
|-------------------------|-----------|--------------------------------|--------------------------------|--------------------------------|--------------------------------|-----------------|-------------------------------|---------------------------------|-------|
| NR                      | Ipsi      | 13.3 ± 0.4                     | 7.87 ± 0.6                     | 0.76 ± 0.02                    | 2.56 ± 0.1                     | 273 ± 13        | 16.8 ± 0.3                    | 1.84 ± 0.02                     | 27, 5 |
|                         | Contra    | 13.3 ± 0.4                     | 8.90 ± 0.6                     | 0.75 ± 0.02                    | 2.56 ± 0.1                     | 294 ± 12        | 16.2 ± 0.3                    | 1.82 ± 0.02                     | 29, 5 |
|                         | statistic | <i>t</i> <sub>(54)</sub> =0.06 | <i>t</i> <sub>(54)</sub> =1.2  | <i>U</i> =390.5                | <i>t</i> <sub>(54)</sub> =0.03 | <i>U</i> =289   | <i>t</i> <sub>(54)</sub> =1.2 | <i>U</i> =358.5                 |       |
|                         | <i>P</i>  | 0.95                           | 0.22                           | 0.99                           | 0.97                           | 0.09            | 0.2                           | 0.59                            |       |
| 2d MD                   | Ipsi      | 13.4 ± 0.3                     | 7.00 ± 0.5                     | 0.81 ± 0.02                    | 2.72 ± 0.1                     | 283 ± 15        | 16.5 ± 0.4                    | 1.83 ± 0.02                     | 25, 5 |
|                         | Contra    | 12.3 ± 0.3                     | 9.76 ± 0.7                     | 0.79 ± 0.02                    | 2.69 ± 0.1                     | 278 ± 17        | 16.6 ± 0.4                    | 1.81 ± 0.02                     | 27, 5 |
|                         | statistic | <i>t</i> <sub>(50)</sub> =2.5  | <i>t</i> <sub>(50)</sub> =3.1  | <i>t</i> <sub>(50)</sub> =0.83 | <i>t</i> <sub>(50)</sub> =0.37 | <i>U</i> =313.5 | <i>t</i> <sub>(50)</sub> =0.2 | <i>t</i> <sub>(50)</sub> =0.63  |       |
|                         | <i>P</i>  | <b>0.018*</b>                  | <b>0.003*</b>                  | 0.41                           | 0.71                           | 0.67            | 0.8                           | 0.53                            |       |
| 6d MD<br>Vehicle        | Ipsi      | 12.3 ± 0.4                     | 6.69 ± 0.5                     | 0.81 ± 0.02                    | 2.67 ± 0.1                     | 307 ± 33        | 16.0 ± 0.4                    | 1.81 ± 0.02                     | 23, 5 |
|                         | Contra    | 13.4 ± 0.3                     | 6.98 ± 0.5                     | 0.78 ± 0.02                    | 2.70 ± 0.1                     | 271 ± 14        | 16.6 ± 0.3                    | 1.81 ± 0.02                     | 28, 5 |
|                         | statistic | <i>t</i> <sub>(49)</sub> =2.6  | <i>U</i> =308                  | <i>t</i> <sub>(49)</sub> =0.81 | <i>U</i> =305                  | <i>U</i> =258.5 | <i>t</i> <sub>(49)</sub> =1.2 | <i>t</i> <sub>(49)</sub> =0.007 |       |
|                         | <i>P</i>  | <b>0.012*</b>                  | 0.80                           | 0.42                           | 0.75                           | 0.23            | 0.26                          | 0.99                            |       |
| 6d MD<br>Ro 25-<br>6981 | Ipsi      | 13.8 ± 0.3                     | 7.40 ± 0.5                     | 0.82 ± 0.03                    | 2.77 ± 0.1                     | 282 ± 13        | 16.1 ± 0.4                    | 1.80 ± 0.02                     | 24, 5 |
|                         | Contra    | 12.4 ± 0.4                     | 7.49 ± 0.6                     | 0.85 ± 0.02                    | 2.89 ± 0.1                     | 318 ± 19        | 16.9 ± 0.5                    | 1.81 ± 0.02                     | 27, 5 |
|                         | statistic | <i>t</i> <sub>(49)</sub> =2.8  | <i>t</i> <sub>(49)</sub> =0.11 | <i>t</i> <sub>(49)</sub> =0.92 | <i>t</i> <sub>(49)</sub> =1.09 | <i>U</i> =249.5 | <i>t</i> <sub>(49)</sub> =1.1 | <i>t</i> <sub>(49)</sub> =0.30  |       |
|                         | <i>P</i>  | <b>0.0075*</b>                 | 0.91                           | 0.36                           | 0.28                           | 0.16            | 0.3                           | 0.77                            |       |

**Table 2.** mEPSC properties and recording conditions after 2d MD (related to Figure 3). For each treatment, data were compared between control (ipsi) and deprived (contra) hemispheres using 2-tailed unpaired *t* tests (*t* statistic reported) or Mann-Whitney tests (*U* statistic reported), as indicated. Bold values indicate significant differences. Data are shown as mean±SEM. N is reported as cells, mice.

|                |           | Amplitude<br>(pA)              | Frequency<br>(Hz)              | Rise<br>(ms)                  | Decay<br>(ms)                 | Rin<br>(M $\Omega$ ) | Rs<br>(M $\Omega$ )             | RMS                            | N     |
|----------------|-----------|--------------------------------|--------------------------------|-------------------------------|-------------------------------|----------------------|---------------------------------|--------------------------------|-------|
| Vehicle        | Ipsi      | 13.6 ± 0.3                     | 9.7 ± 0.9                      | 0.80 ± 0.02                   | 2.74 ± 0.1                    | 243 ± 16             | 15.6 ± 0.5                      | 1.87 ± 0.02                    | 22, 5 |
|                | Contra    | 12.5 ± 0.3                     | 9.3 ± 0.8                      | 0.84 ± 0.03                   | 3.05 ± 0.1                    | 226 ± 15             | 16.3 ± 0.5                      | 1.86 ± 0.03                    | 23, 5 |
|                | statistic | <i>t</i> <sub>(43)</sub> =2.6  | <i>t</i> <sub>(43)</sub> =0.32 | <i>t</i> <sub>(43)</sub> =1.1 | <i>t</i> <sub>(43)</sub> =2.3 | <i>U</i> =206.5      | <i>U</i> =202                   | <i>t</i> <sub>(43)</sub> =0.38 |       |
|                | <i>P</i>  | <b>0.013*</b>                  | 0.75                           | 0.26                          | <b>0.029*</b>                 | 0.30                 | 0.25                            | 0.71                           |       |
| Ro 25-<br>6981 | Ipsi      | 13.3 ± 0.3                     | 9.72 ± 0.9                     | 0.82 ± 0.02                   | 2.73 ± 0.1                    | 230 ± 18             | 16.2 ± 0.5                      | 1.89 ± 0.02                    | 23, 5 |
|                | Contra    | 13.1 ± 0.3                     | 6.20 ± 0.5                     | 0.85 ± 0.02                   | 2.81 ± 0.1                    | 226 ± 17             | 16.2 ± 0.4                      | 1.89 ± 0.02                    | 22, 5 |
|                | statistic | <i>t</i> <sub>(43)</sub> =0.41 | <i>U</i> =132                  | <i>t</i> <sub>(43)</sub> =1.4 | <i>U</i> =228.5               | <i>U</i> =249        | <i>t</i> <sub>(43)</sub> =0.023 | <i>t</i> <sub>(43)</sub> =0.18 |       |
|                | <i>P</i>  | 0.69                           | <b>0.005*</b>                  | 0.18                          | 0.58                          | 0.94                 | 0.98                            | 0.86                           |       |
